# Supplementary material
Source: PubMed Central journal article supplement (PMC6511769)
Supplement: ajtr0011-2422-f5.pdf [file ajtr0011-2422-f5.pdf]

## Hbsp modulates mir21/atg12 axis alleviates cardiomyocyte h/r injury

**Table S1.** Sequence of primers used for RT-PCR

| RNA name |         | Sequence                       |
|----------|---------|--------------------------------|
| U6       | Forward | 5'-CTCGCTTCGGCAGCACA-3'        |
|          | Reverse | 5'-AACGCTTCACGAATTTGCGT-3'     |
| miR-21   | Forward | 5'-GCCGCTAGCTTATCAGACTGATGT-3' |
|          | Reverse | 5'-GTGCAGGGTCCGAGGT-3'         |
| Atg12    | Forward | 5'-CTTAAACTGGTGGCCTCGGA-3'     |
|          | Reverse | 5'-TTTCTGGCTCATCCCCATGC-3'     |
| Atg5     | Forward | 5'-ACCTCGGTTTGGCTTTGGTT-3'     |
|          | Reverse | 5'-ACCACACATCTCGAAGCACA-3'     |
